# Supplementary material for: Green tea polyphenol epigallocatechin-3-gallate alleviates nonalcoholic fatty liver disease and ameliorates intestinal immunity in mice fed a high-fat diet
Source: Royal Society of Chemistry journal article supplement (doi:10.1039/d0fo02152k), 2020-01-01
Supplement: d0fo02152k1.pdf [file d0fo02152k1.pdf]

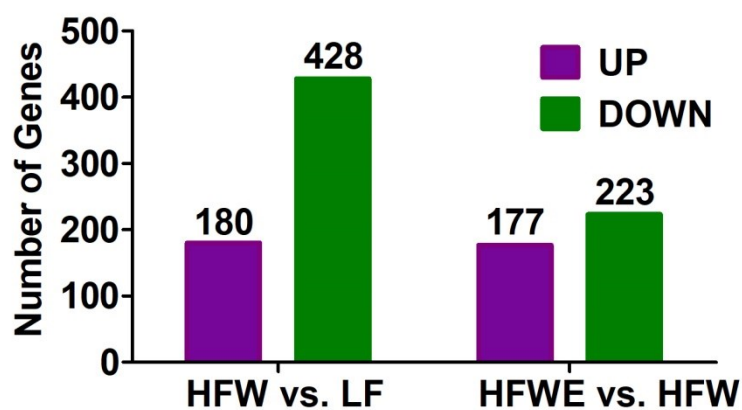

**Supplementary figure 1 The number of differentially expressed genes of HFW vs. LF and HFWE vs. HFW.** Q-value ( $q \leq 0.001$ ) was employed to screen differentially expressed genes (DEGs), and the genes with a difference multiple of more than 2 were defined as DEGs.

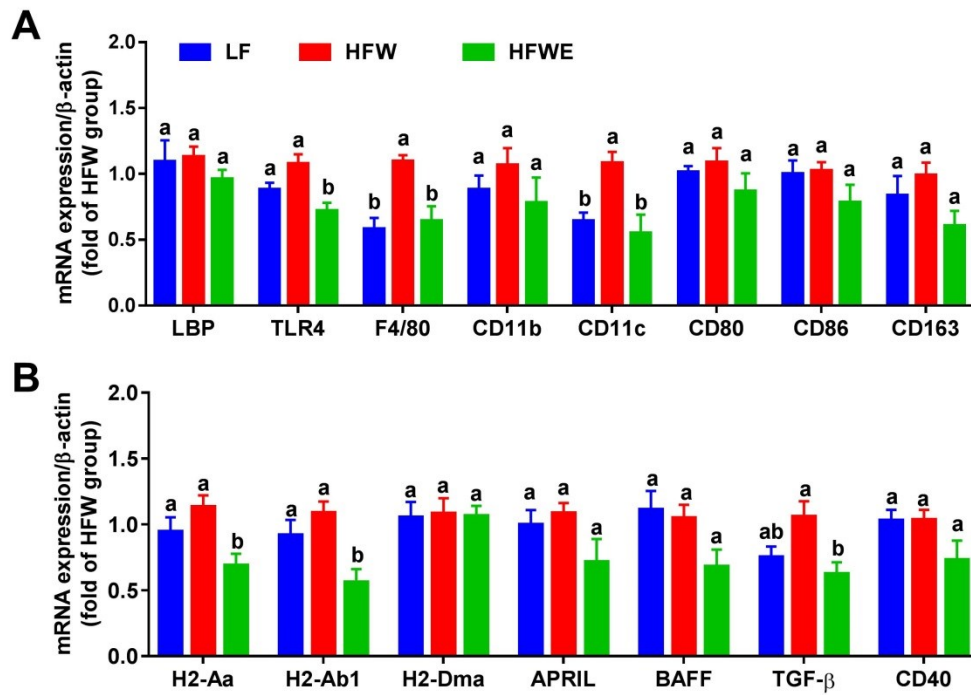

**Supplementary figure 2 Effects of dietary EGCG on mRNA levels of several colonic immune key genes.** The gene expressions of several colonic immune key genes were determined using RT-qPCR technique. All data are expressed as mean  $\pm$ SEM (n=12). <sup>a,b,c</sup>Significant difference among groups (ANOVA,  $p < 0.05$ ).
